# Supplementary material
Source: PubMed Central journal article supplement (PMC6851497)
Supplement: NIHMS1540153-supplement-1.pdf [file NIHMS1540153-supplement-1.pdf]

| Protein         | CASP target  | Chemistry | Protein concentration (mg/mL) | Incubation time (min) | Incubation temp. (°C) | Buffer                                                               |
|-----------------|--------------|-----------|-------------------------------|-----------------------|-----------------------|----------------------------------------------------------------------|
| <b>CDI209</b>   | <b>X0957</b> | DSS       | 0.25                          | 30                    | 25                    | 50 mM HEPES/Na pH 7.8, 150 mM NaCl and 2 mM DTT                      |
|                 |              | PDH       | 1                             | 30                    | 25                    | 50 mM HEPES/Na pH 7.8, 150 mM NaCl and 2 mM DTT                      |
| <b>CDI213</b>   | <b>X0968</b> | DSS       | 0.25                          | 30                    | 25                    | 50 mM HEPES/Na pH 7.8, 150 mM NaCl and 2 mM DTT                      |
|                 |              | PDH       | 1                             | 30                    | 37                    | 50 mM HEPES/Na pH 7.8, 150 mM NaCl and 2 mM DTT                      |
| <b>ETH</b>      | <b>X0953</b> | DSS       | 1                             | 30                    | 25                    | 20 mM HEPES pH 7.5                                                   |
|                 |              | PDH       | 1                             | 30                    | 25                    | 20 mM HEPES pH 7.5                                                   |
| <b>gp146</b>    | <b>X0981</b> | DSS       | 1                             | 30                    | 25                    | 10 mM Tris-HCl pH 8.5 > exchanged to 20 mM Hepes pH 8.5, 150 mM NaCl |
|                 |              | PDH       |                               | Not performed         |                       |                                                                      |
| <b>Esp405</b>   | <b>X0987</b> | DSS       | 1                             | 30                    | 25                    | PBS buffer pH 7.4                                                    |
|                 |              | PDH       | 1                             | 30                    | 25                    | PBS buffer pH 7.4                                                    |
| <b>Exo5</b>     | <b>X0975</b> | DSS       | 1                             | 30                    | 25                    | 50 mM HEPES, pH 7.5, 300 mM NaCl, 0.5 mM TCEP, 3% glycerol           |
|                 |              | PDH       | 1                             | 30                    | 25                    | 50 mM HEPES, pH 7.5, 300 mM NaCl, 0.5 mM TCEP, 3% glycerol           |
| <b>ACL_1061</b> | <b>X0985</b> | DSS       | 0.5                           | 30                    | 25                    | 20 mM HEPES pH 7.5, 50 mM NaCl, 1 mM DTT                             |
|                 |              | PDH       | 1                             | 30                    | 25                    | 20 mM HEPES pH 7.5, 50 mM NaCl, 1 mM DTT                             |
| <b>AROM</b>     | <b>X0999</b> | DSS       | 1                             | 30                    | 37                    | 20 mM HEPES pH 8.0, 150 mM NaCl, 2 mM TCEP, 1% sucrose, 15% glycerol |
|                 |              | PDH       |                               | Not performed         |                       |                                                                      |

**Supplementary Table 1.** Experimental conditions for crosslinking experiments in BigX group.
